# Supplementary material for: Improving Madden–Julian oscillation simulation in atmospheric general circulation models by coupling with a one-dimensional snow–ice–thermocline ocean model
Source: Copernicus journal article supplement (doi:10.5194/gmd-15-5529-2022), 2022-07-20
Supplement: Supplementary file 1 [file gmd-15-5529-2022-supplement.pdf]

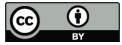

*Supplement of*

## **Improving Madden–Julian oscillation simulation in atmospheric general circulation models by coupling with a one-dimensional snow–ice–thermocline ocean model**

**Wan-Ling Tseng et al.**

*Correspondence to:* Huang-Hsiung Hsu (hhhsu@gate.sinica.edu.tw)

The copyright of individual parts of the supplement might differ from the article licence.

16

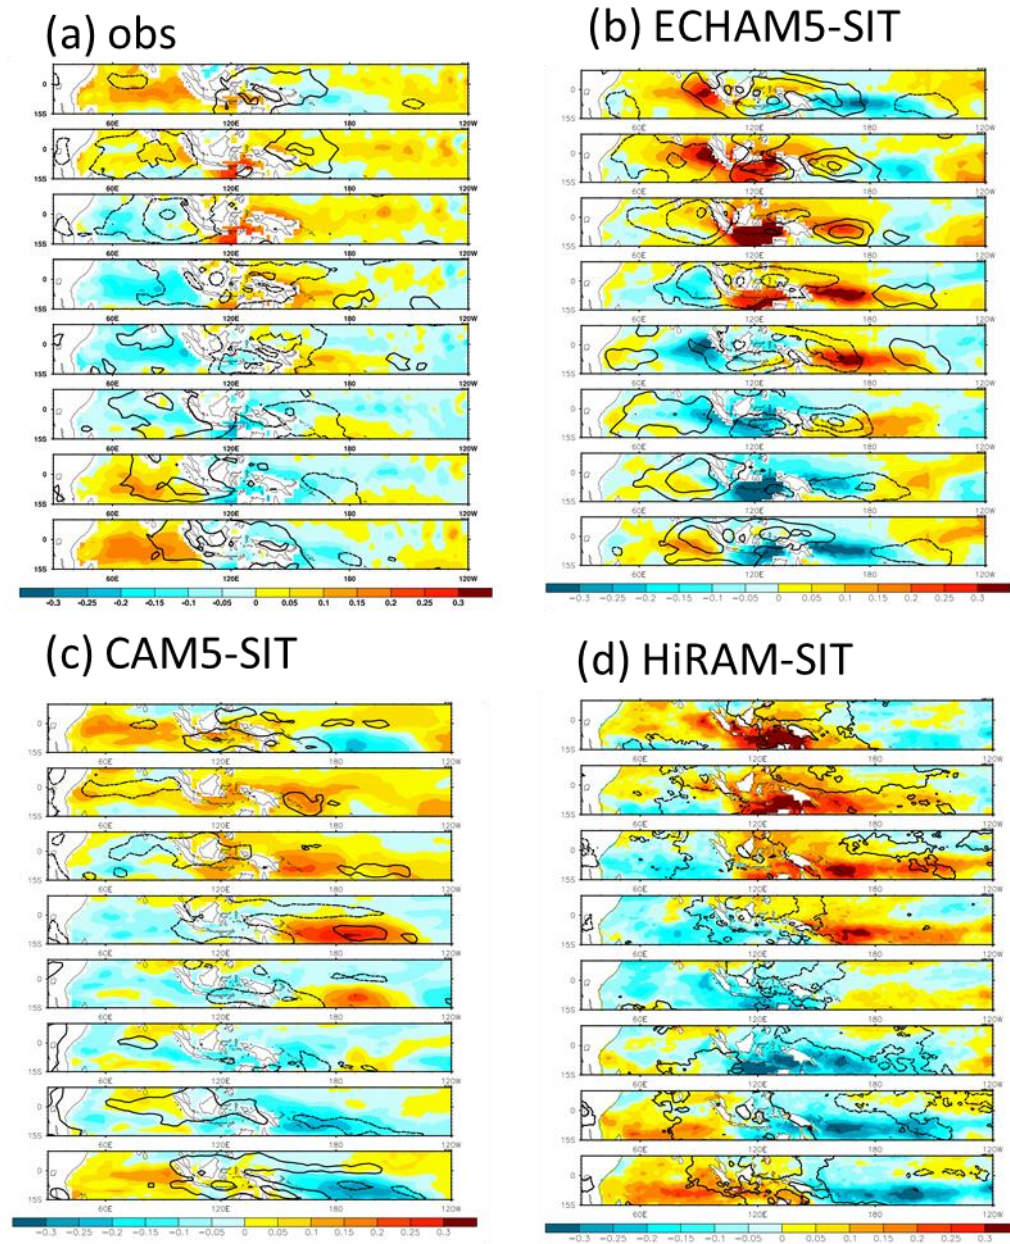

17

18 **Figure S1.** Composite November–April 20–100-day filtering SST ( $^{\circ}\text{C}$ ; color) and OLR  
 19 anomalies ( $\text{W m}^{-1}$ ; vectors) as a function of the MJO phase based on (a) observations, (b)  
 20 ECHAM5-SIT, (c) CAM5-SIT, and (d) HiRAM-SIT.

21

22

23

24

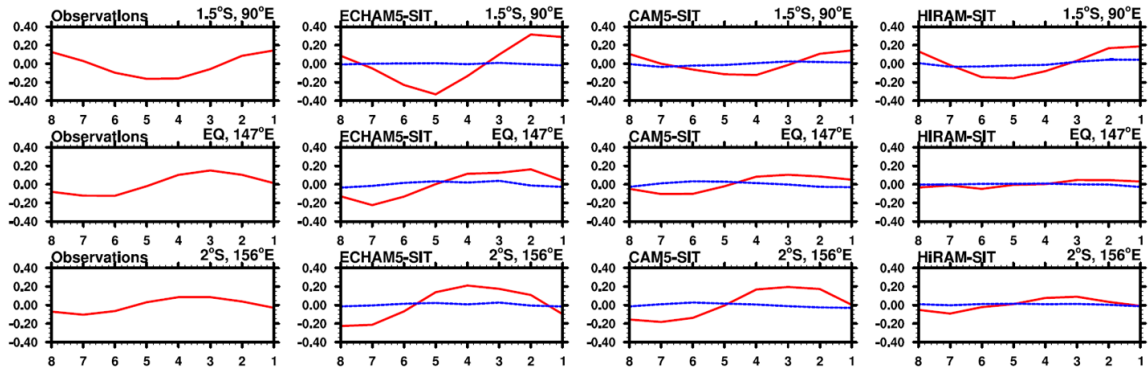

25

26 **Figure S2.** The SST ( $^{\circ}\text{C}$ ) with respect to MJO phases for intraseasonal anomalies (i.e.,  
 27 with 20–100-day filtering) in (a) observations and simulations by using the (b–d) coupled  
 28 and (e–g) uncoupled AGCM. Observations are in suit with data from OISST.

29

30

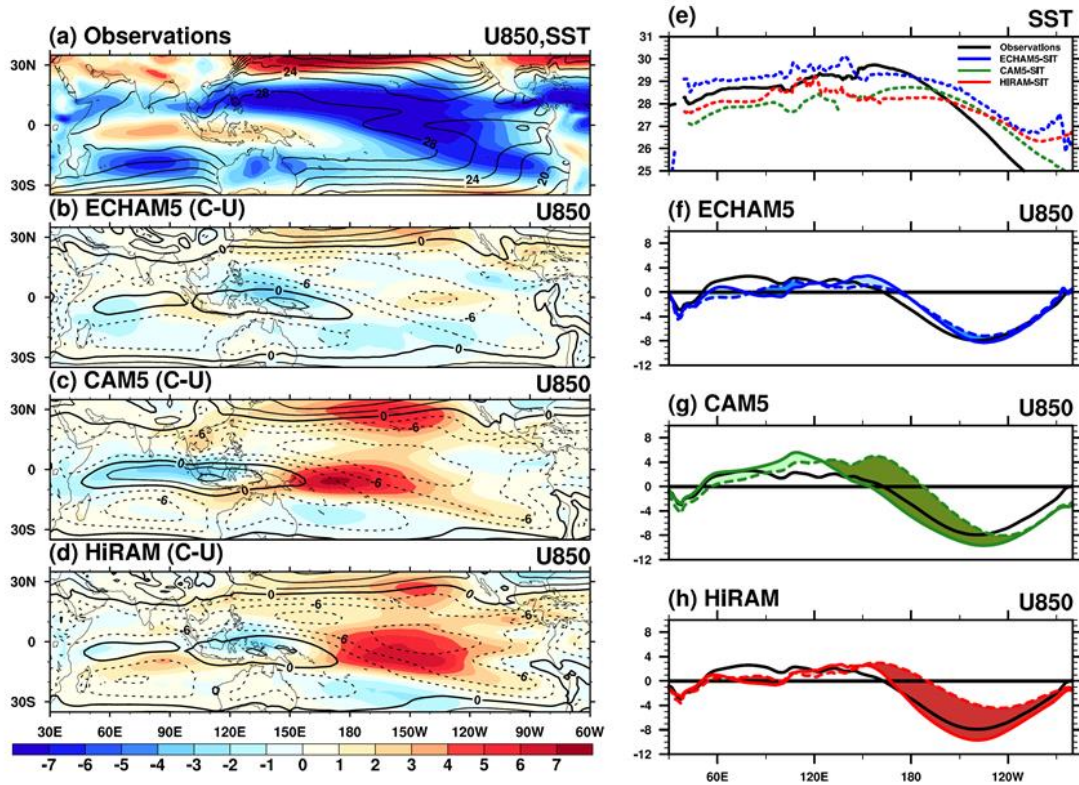

31

32 **Figure S3.** (a) The observational winter (November–April) averaged the mean state in  
 33 850 hPa zonal wind ( $\text{m s}^{-1}$ ; shading) and SST ( $^{\circ}\text{C}$ ; contours). (b–d) The winter averaged  
 34 850 hPa zonal wind difference of coupled and uncoupled simulations ( $\text{m s}^{-1}$ ; shading) and  
 35 uncoupled 850 hPa zonal wind ( $\text{m s}^{-1}$ ; contours) in ECHAM5, CAM5, and HiRAM. (e)  
 36 The  $10^{\circ}\text{S}$ –EQ averaged winter SST ( $^{\circ}\text{C}$ ) in observation and simulations. (f–h) The  $5^{\circ}\text{S}$ –  
 37 EQ averaged winter 850 hPa zonal wind ( $\text{m s}^{-1}$ ) in ECHAM5, CAM5, and HiRAM. The  
 38 solid line is uncoupled and the dashed line is a coupled model.

39

40

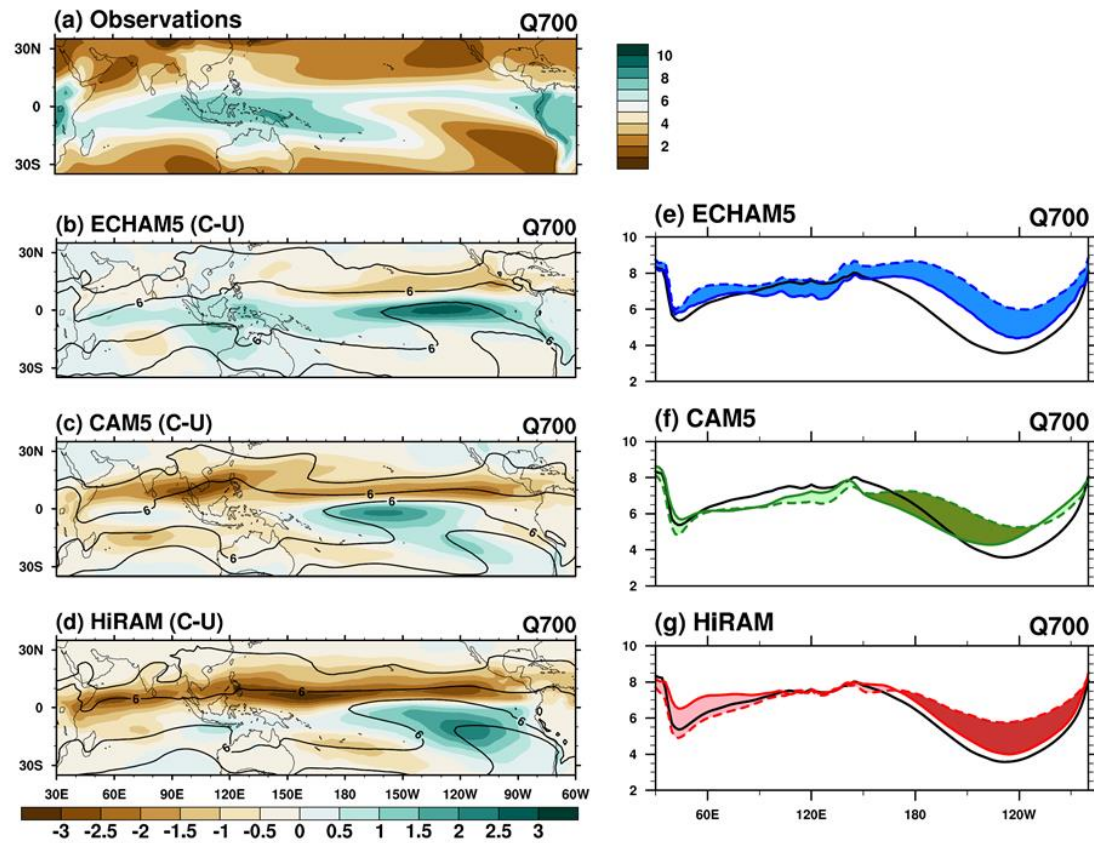

41

42 **Figure S4.** (a) The observational winter (November–April) averaged mean state in  
 43 specific humidity at 700 hPa (Q700;  $\text{kg s}^{-1}$ ; shading). (b–d) The winter averaged Q700  
 44 difference of coupled and uncoupled simulations ( $\text{mm day}^{-1}$ ; shading) and uncoupled  
 45 Q700 ( $\text{kg s}^{-1}$ ; contours) in ECHAM5, CAM5, and HiRAM. (e–g) The 10°S–EQ averaged  
 46 winter Q700 ( $\text{kg s}^{-1}$ ) in ECHAM5, CAM5, and HiRAM. The solid and dashed lines  
 47 indicate uncoupled and coupled models, respectively.

48

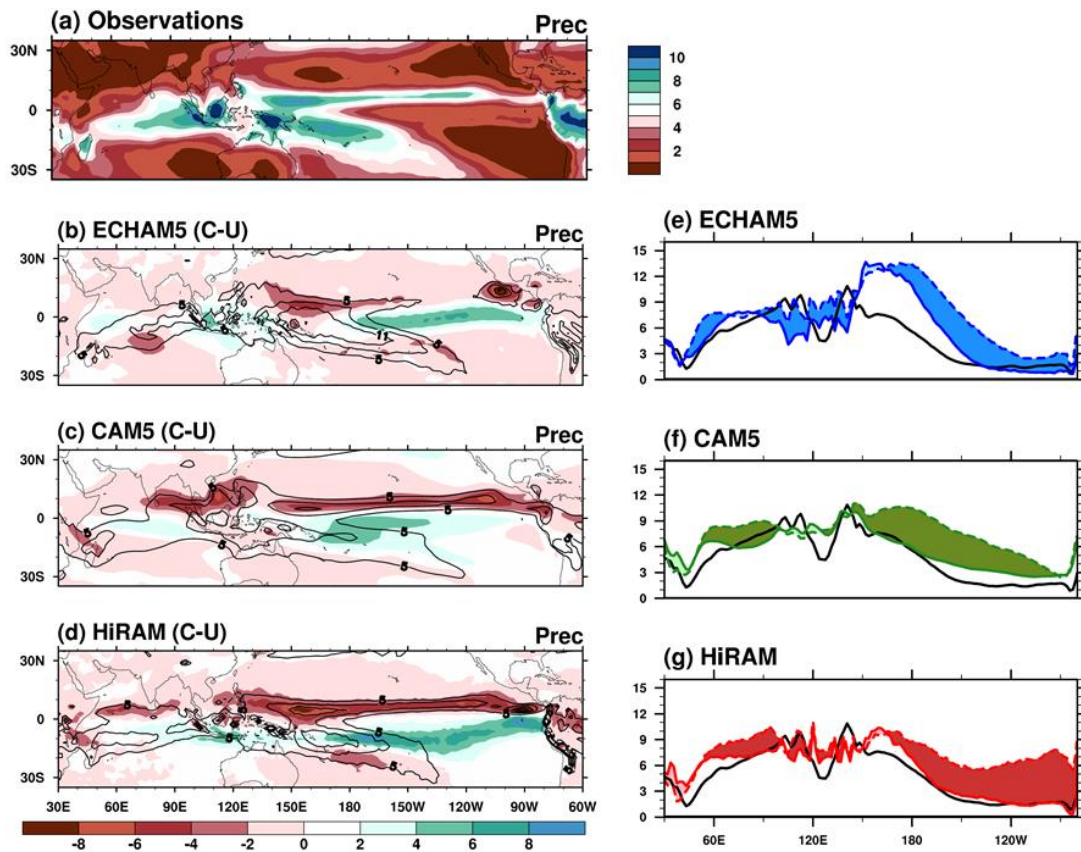

49

50 **Figure S5.** (a) Observational winter (November–April) averaged mean state in  
 51 precipitation ( $\text{mm day}^{-1}$ ; shading). (b–d) Winter averaged precipitation difference of  
 52 coupled and uncoupled simulations ( $\text{mm day}^{-1}$ ; shading) and uncoupled precipitation ( $\text{mm}$   
 53  $\text{day}^{-1}$ ; contours) in ECHAM5, CAM5, and HiRAM. (e–g) The  $10^{\circ}\text{S}$ –EQ averaged winter  
 54 precipitation ( $\text{mm day}^{-1}$ ) in ECHAM5, CAM5, and HiRAM. The solid and dashed lines  
 55 indicate uncoupled and coupled models, respectively.

56

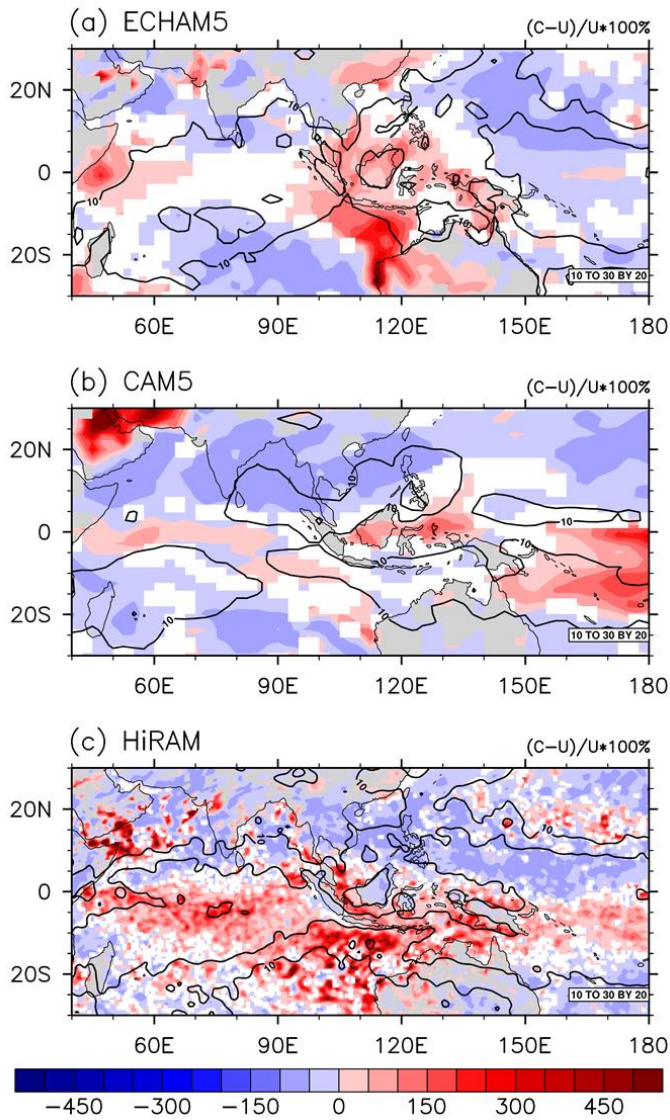

57

58 **Figure S6.** Ratio of the precipitation variance between the coupled and uncoupled models59 on intraseasonal time scales. The ratio is defined as  $(\text{coupled} - \text{uncoupled}) / \text{uncoupled} * 100\%$ 60  $100\%$ . The colored areas indicate where the ratio is statistically significant at 1% based61 on an F test. The contours show the intraseasonal precipitation variance  $(\text{mm day}^{-1})^2$  in62 the uncoupled simulation. The 9-point local smoothing is applied in the intraseasonal  
63 precipitation variance of HiRAM here (contours only).

64

65
